# Supplementary material for: Activated ROCK/Akt/eNOS and ET-1/ERK pathways in 5-fluorouracil-induced cardiotoxicity: modulation by simvastatin
Source: PubMed Central journal article supplement (PMC7477553; doi:10.1038/s41598-020-71531-8), 2020-09-07

## **Activated ROCK/Akt/eNOS and ET-1/ERK pathways in 5-fluorouracil-induced cardiotoxicity: Modulation by simvastatin**

Radwa Nasser Muhammad<sup>1</sup>, Nada Mohammed Sallam<sup>1</sup>, Hanan Salah El-Abhar<sup>1,2</sup>

*<sup>1</sup>Department of Pharmacology and Toxicology, Faculty of Pharmacy, Cairo University, Cairo 11562, Egypt.*

*<sup>2</sup>Department of Pharmacology & Toxicology, Faculty of Pharmaceutical Sciences and Pharmaceutical Industries, Future University in Egypt, Cairo 11835, Egypt.*

Short title: Simvastatin in 5-fluorouracil cardiotoxicity.

Word count: 8100

Manuscript Category: Original Research

### **Author for Correspondence:**

Radwa Nasser Muhammad

Department of Pharmacology and Toxicology

Faculty of pharmacy

Cairo University

Cairo, 11562, Egypt

Email: [radwa.nasser@pharma.cu.edu.eg](mailto:radwa.nasser@pharma.cu.edu.eg) ; Phone: +201118311912

Supplementary figure (S1)

(A)  $\beta$ -Actin

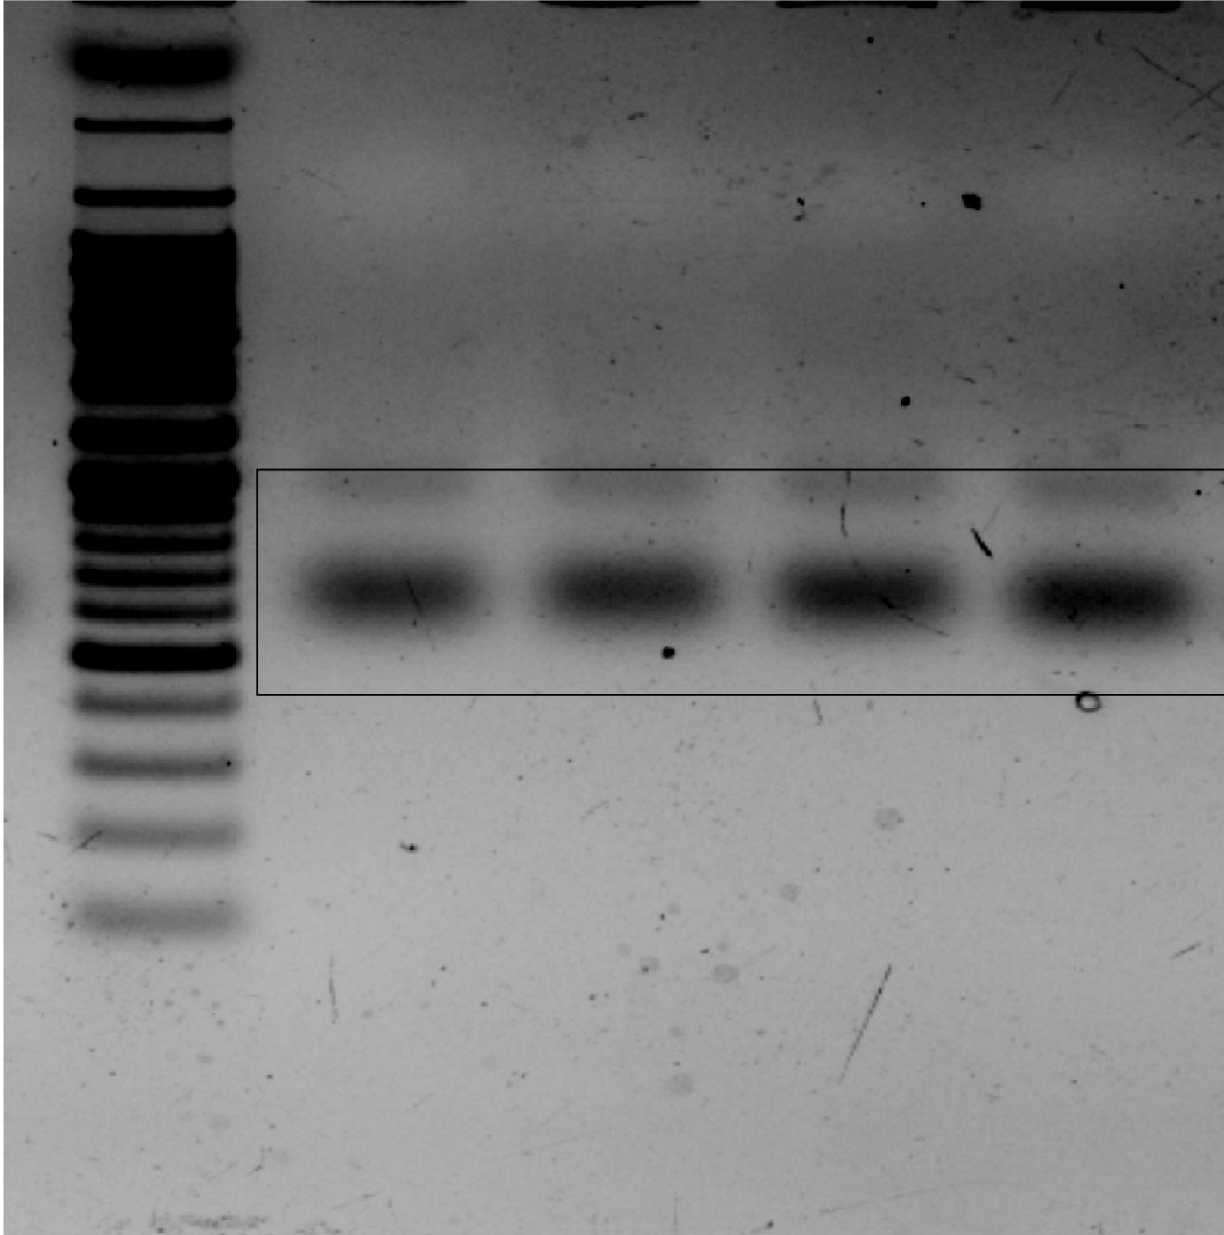

**(B)** ROCK

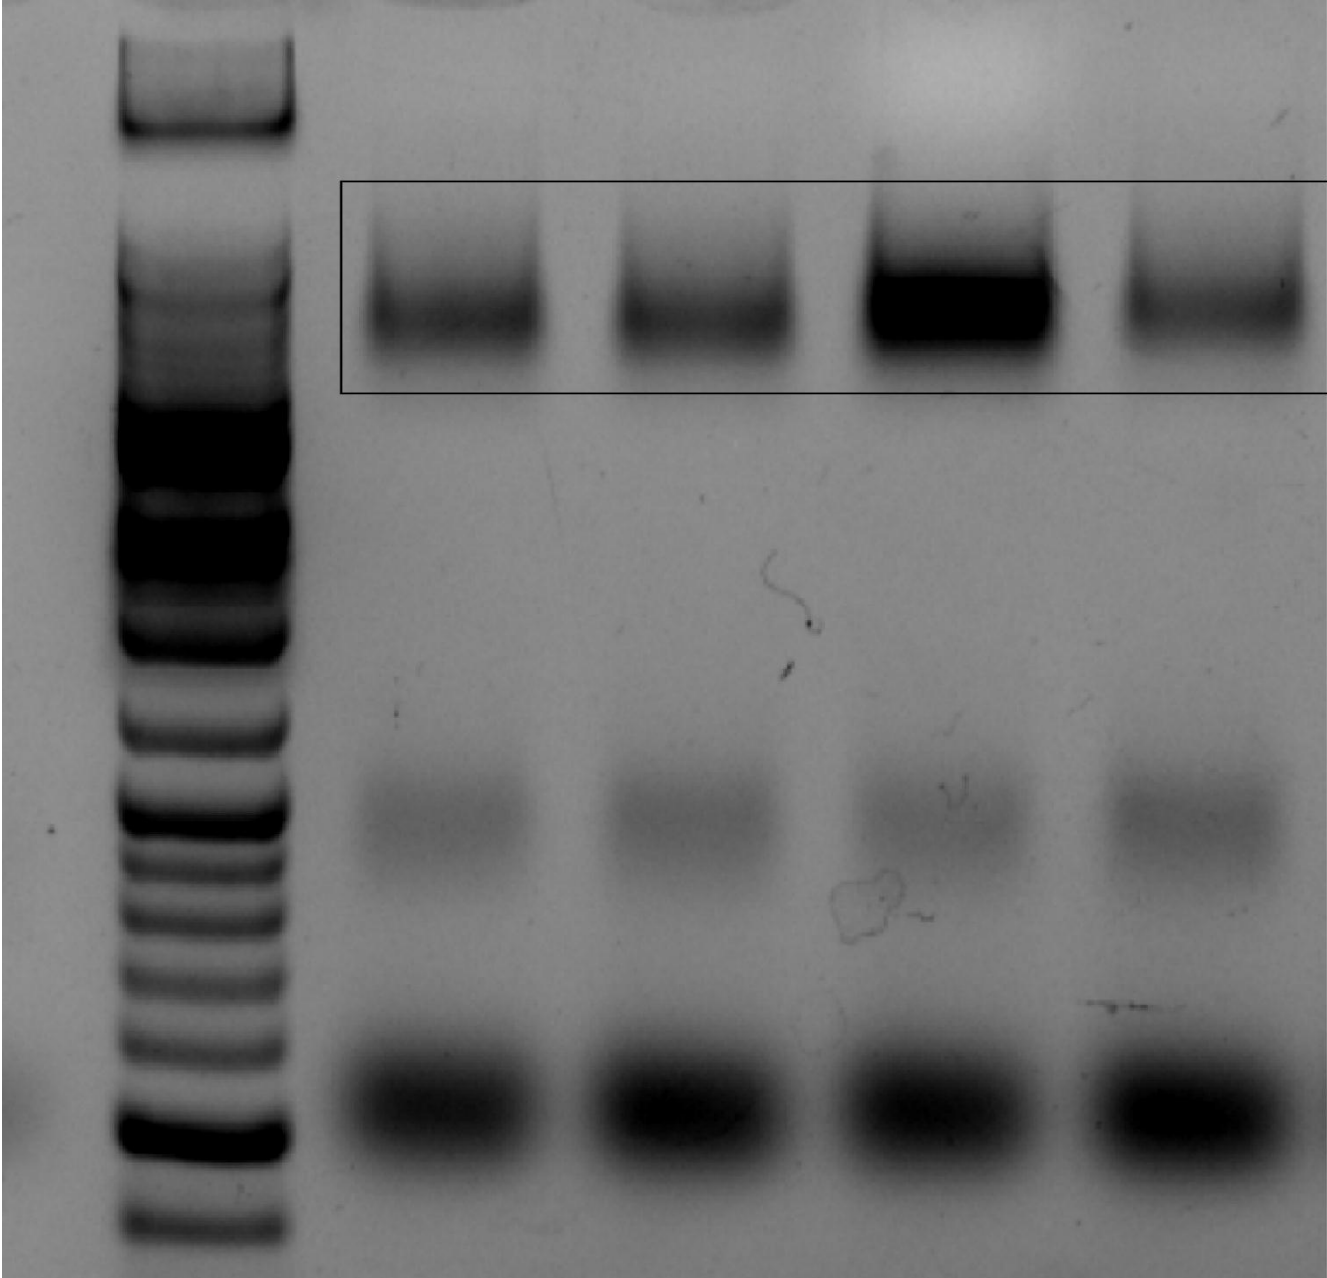

**(C)** Caspase-3

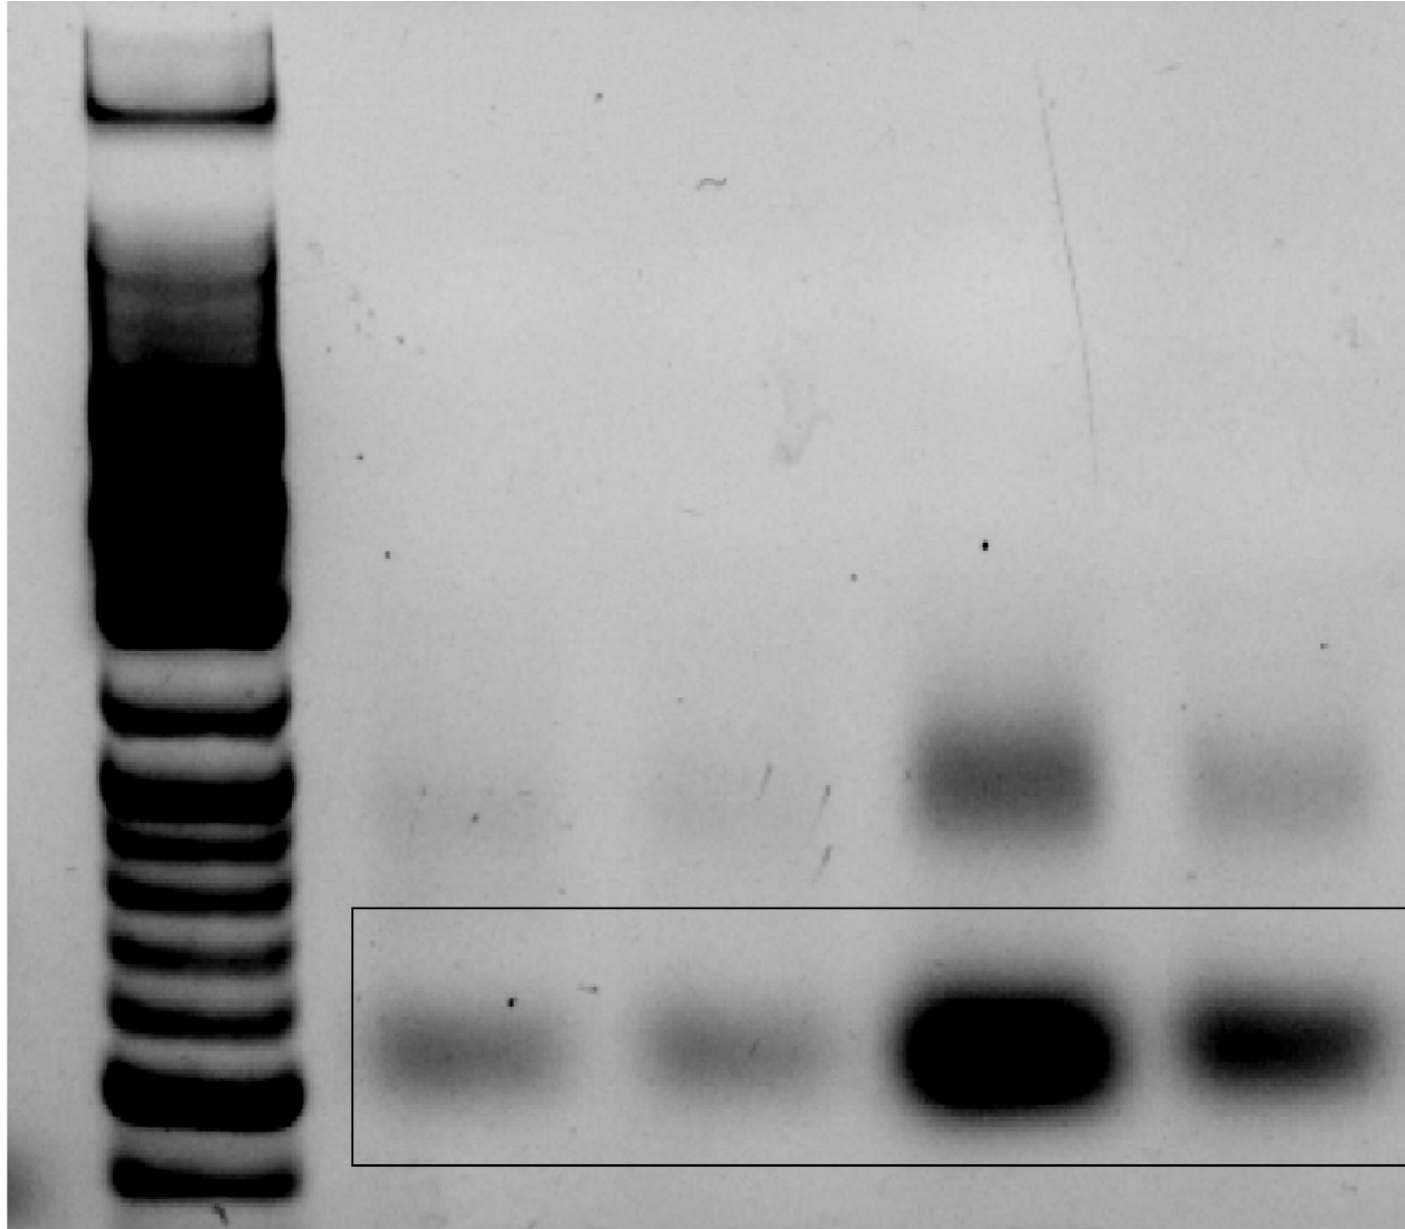

Supplementary figure (S2)

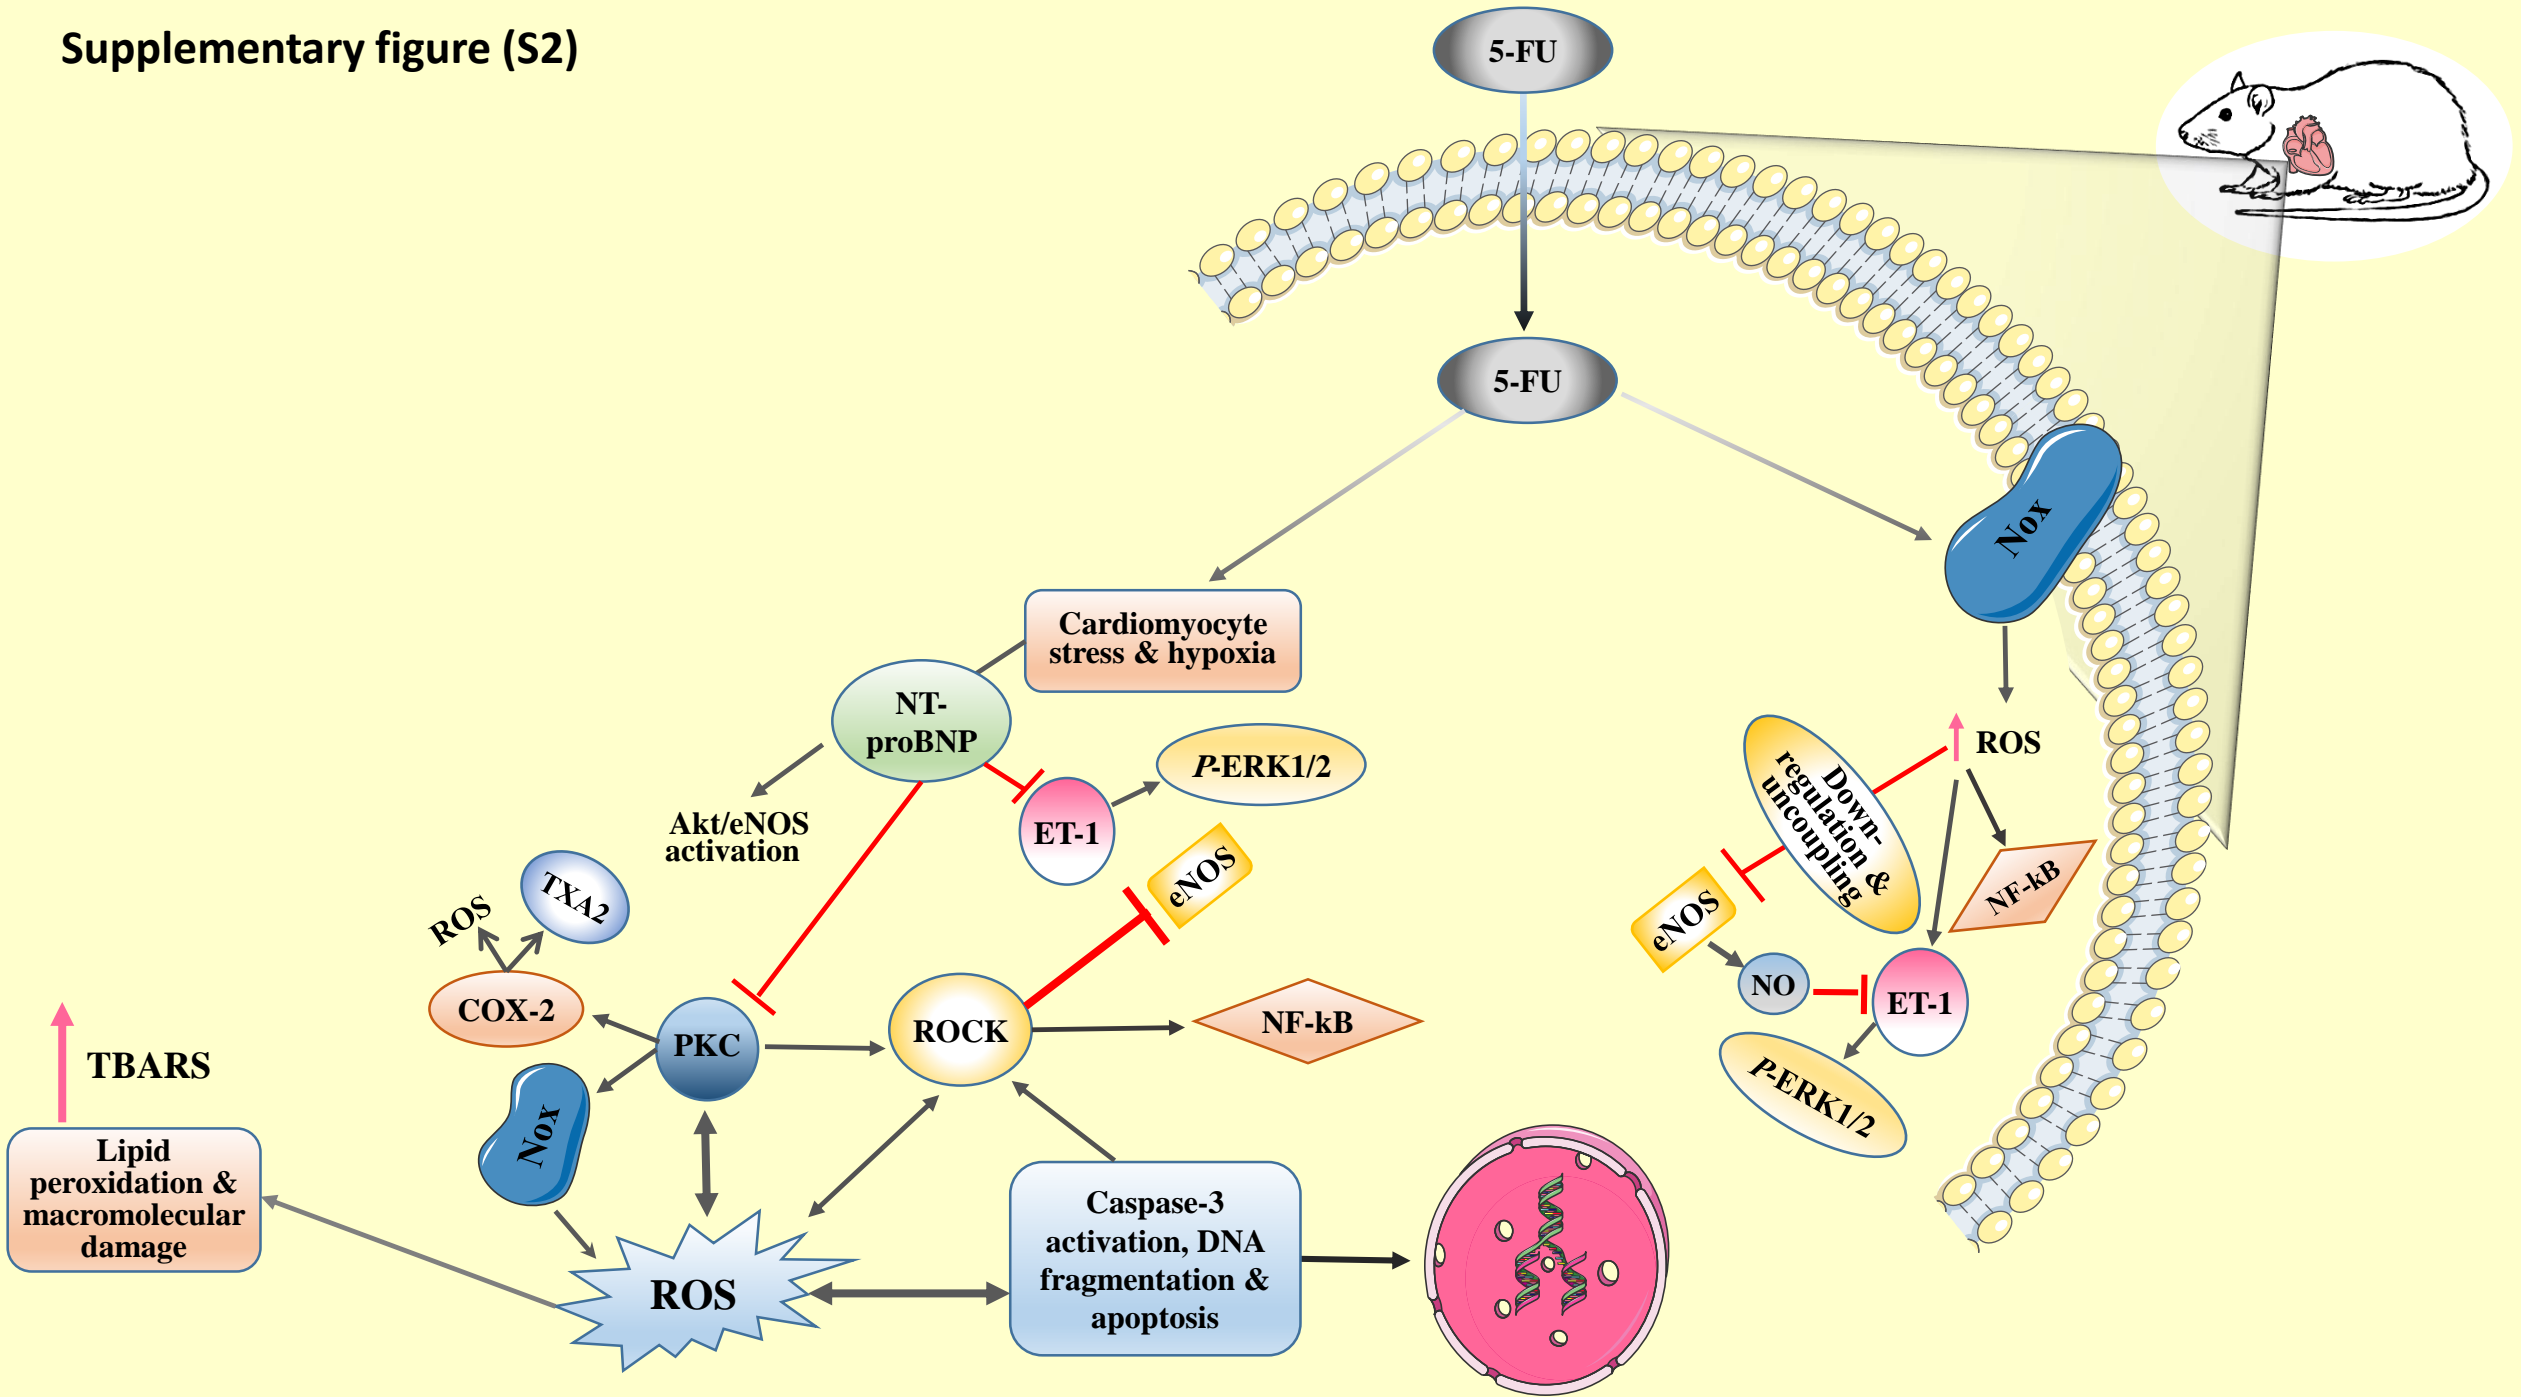

Supplement: 41598_2020_71531_MOESM1_ESM.pdf [file 41598_2020_71531_MOESM1_ESM.pdf]
